# Supplementary material
Source: Springer Nature journal article supplement (https://www.springermedizin.de/resource/supplementary/12885_2008_1204_MOESM4_ESM.pdf/9471400)

**Bcl-2**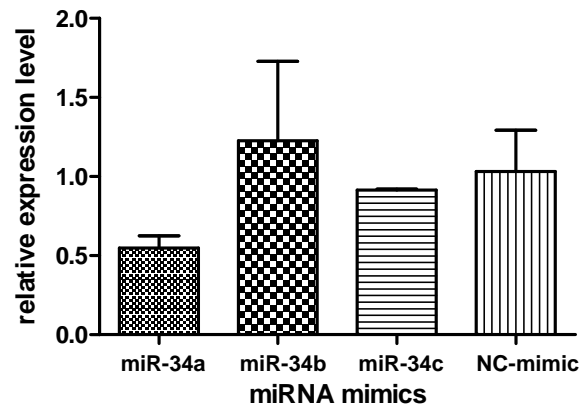**HMGA2**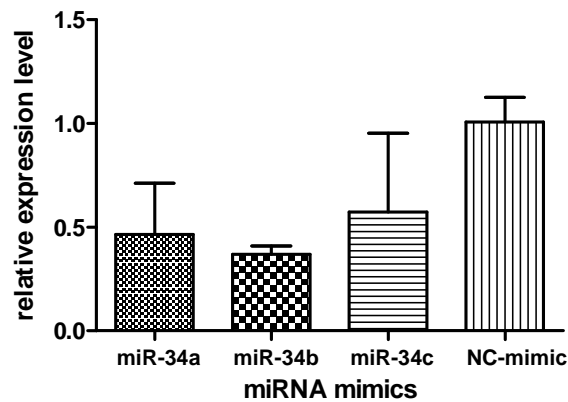**NOTCH1**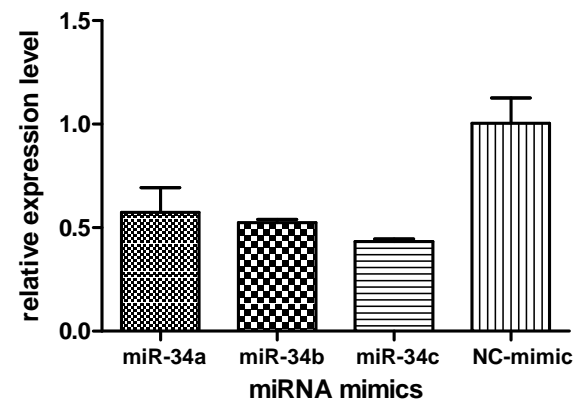**NOTCH2**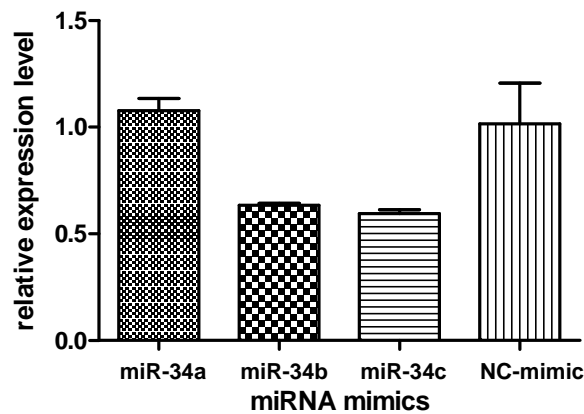**NOTCH3**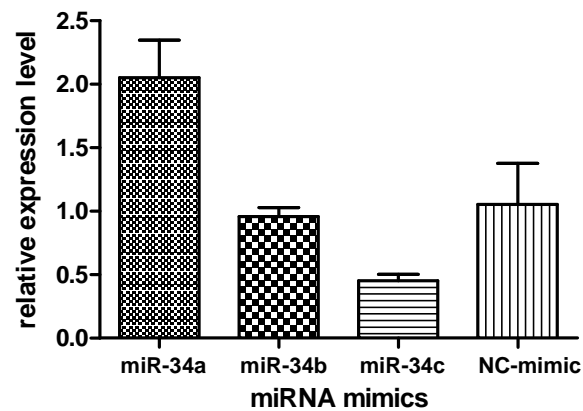**NOTCH4**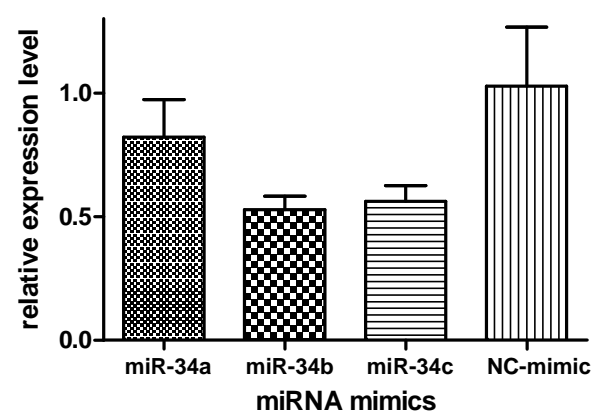

Supplement: MOESM4 [file 9471400]
